# Supplementary material for: Lactobacillus plantarum Exhibits Antioxidant and Cytoprotective Activities in Porcine Intestinal Epithelial Cells Exposed to Hydrogen Peroxide
Source: Oxid Med Cell Longev. 2021 Jul 30;2021:8936907. doi: 10.1155/2021/8936907 (PMC8349292; doi:10.1155/2021/8936907)
Supplement: Supplementary Materials — Supplementary Table S1: sequences of the primers used in this study. Supplementary Table S2: antibodies used in this study. [file 8936907.f1.zip]

Archive with 3 entries (2 files):
- 8936907.f1/Supplementary Table S1.docx
- 8936907.f1/Supplementary Table S2.docx
- 8936907.f1/
